# Supplementary material
Source: PubMed Central journal article supplement (PMC3486136)
Supplement: MCB.00559-12_zmb999109720so1.pdf [file MCB.00559-12_zmb999109720so1.pdf]

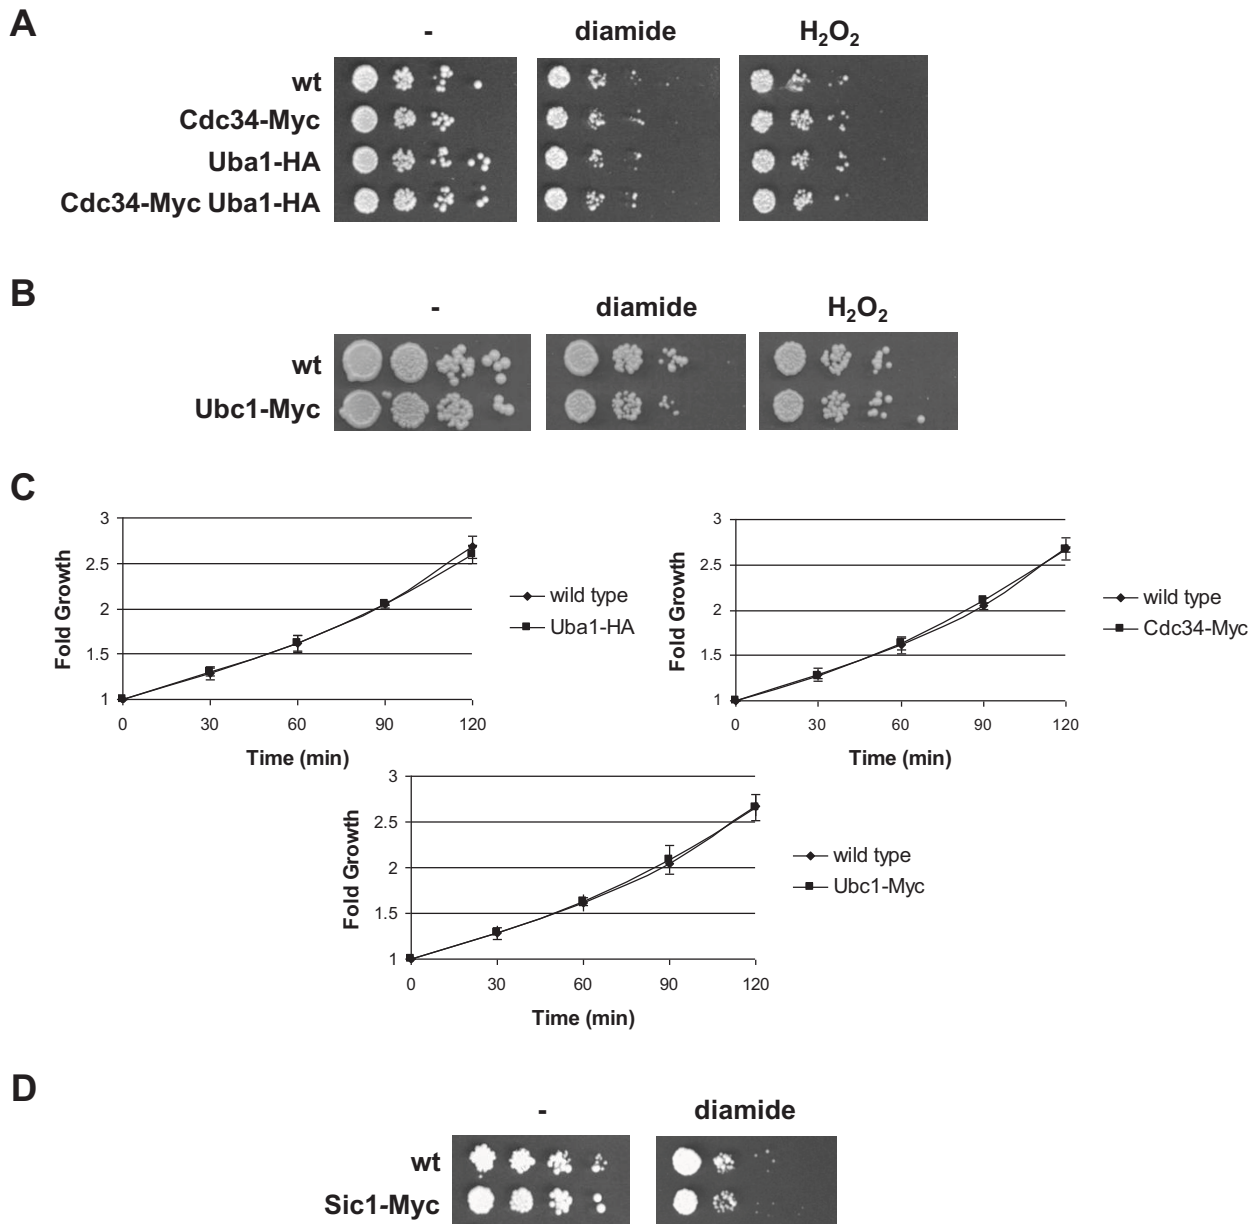

**Figure S1. Cells expressing epitope-tagged Uba1, Cdc34, Ubc1 and Sic1 exhibited wild-type growth under normal and oxidative stress conditions.** 10-fold serial dilutions of wild-type cells (W303-1a – wt) and either cells expressing (A) 13Myc epitope-tagged Cdc34 (KD79 – Cdc34-Myc), 3HA epitope-tagged Uba1 (KD102 – Uba1-HA) or both 13Myc epitope-tagged Cdc34 and 3HA epitope-tagged Uba1 (KD103 – Cdc34-Myc Uba1-HA), (B) 13Myc epitope-tagged Ubc1 (KD130 – Ubc1-Myc) or (D) 13Myc epitope-tagged Sic1 (KD4 – Sic1-Myc), were spotted onto either YPD media or YPD media containing either (A and B) 2mM diamide or 2mM H<sub>2</sub>O<sub>2</sub>, or (D) 1.8mM diamide, and incubated at 30°C for 2 days. (C) Cells expressing either Uba1-HA (KD102), Cdc34-Myc (KD79) or Ubc1-Myc (KD130) grew similarly to wild-type (W303-1a) cells in liquid YPD media at 30°C. Growth curves were performed three times and error bars indicate the SEM.

| Primer Name   | Sequence (5'- 3')                                                                                                                          |
|---------------|--------------------------------------------------------------------------------------------------------------------------------------------|
| Cdc34tagF     | AACGACAGCGTCATGGATAGGAAACAACCCCAAGGCTGAAG<br>ATGAAAGTGAAGATGTGGAGGATGTAGAAAGAGTTTCAAAGAA<br>AATACGGATCCCCGGGTAAATTA                        |
| Cdc34tagR     | ACCGTATCGCGTATGTATAAATTGATTCATGTTTTGCGTTTGAG<br>CTGAATATGTTTTGTAAATTTGTCTTCTTCTTACTGTTCTTTT<br>GAATTCGAGCTCGTTTAAAC                        |
| Sic1tagF      | GGAGAGGTGGTAGAGAAACGAAGGTTAACGGATGAAGAAAAG<br>AGAAGATTCAAGCCAAAGGCATTGTTTCAATCTAGGGATCAAG<br>AGCATCGGATCCCCGGGTAAATTA                      |
| Sic1tagR      | ATGTTGATGTTAATGCCCTTTGCAAATAAATGTAGAATAAGTA<br>AGTAAATAAAATATAATCGTTCCAGAACTTTTTTTTTTCATTTC<br>TGAATTCGAGCTCGTTTAAAC                       |
| Uba1TagF      | CCGGCACATGTATCTACAATGATTCTCGAAATTTGCGCAGATGA<br>CAAGGAAGGAGAGGATGTTGAAGTTCCTTTCATTACCATTATC<br>TACGGATCCCCGGGTAAATTA                       |
| Uba1TagR      | CAAAGAAAAAGTTGTCAAAGTCATACATATATATACATAT<br>TTAATGTATATATTTAATTTATTTTTTATTTTGGTTAATTAGTTA<br>CGAATTCGAGCTCGTTTAAAC                         |
| Ubc1TagF      | ATTGTGGAAGTGTTGAGACGATTAGGCGTCAAGTCCTTAGACCC<br>CAATGACAACAACACAGCCAACCGTATCATCGAGGAATTGTTG<br>AAGCGGATCCCCGGGTAAATTA                      |
| Ubc1TagR      | ACAATGAAACATCCTCGCTTGGTGTTTTACTCATATAGTTTATTT<br>ATTCTTTATTTACTTACTTACTTGGTGCGTTTTTTTTTATCTATG<br>AATTCGAGCTCGTTTAAAC                      |
| Sic1KOF       | ATATCCAAAGGATAAGGTATTGTCTTTGTAATCAATCAACCAA<br>ACCTCTACGGAATTTTGACCCTTGAAGCAGGGACTATTACACGA<br>AAGAATTCGCGGGATCCGG                         |
| Sic1KOR       | ATGTTGATGTTAATGCCCTTTGCAAATAAATGTAGAATAAGTA<br>AGTAAATAAAATATAATCGTTCCAGAACTTTTTTTTTTCATTTC<br>TGCTTGGCTGCAGGTCGACGG                       |
| Uba1EcoRIF    | GGAATTCCTATCCACTCCTTGTTAAGC                                                                                                                |
| Adh1tEcoRIR   | GGAATTCATATTACCCTGTTATCCC                                                                                                                  |
| Uba1MutCF     | CCACCAGAAAAGTCTATCCCATTGTCTACCCTACGTTCTTTCCC                                                                                               |
| Uba1MutCR     | CAATCTTGTTTGGGAAAGAACGTAGGGTAGACAATGGGATAG                                                                                                 |
| BamH13HA6HISF | GGCGGGATCCCGATGTACCATAACGATGTTTCTGACTATGCGGG<br>CTATCCGTATGACGTCCCGGACTATGCAGGATCCTATCCATATG<br>ACGTTCCAGATTACGCTATGCATCACCATCACCATCACATGC |
| BamH1Ubr      | CGGGATCCCTAGCCACCCCTGAGCCG                                                                                                                 |

**Supplementary Table 1.** A list of the oligonucleotide primers used in this study.
